# Supplementary material
Source: publisher site journal article supplement (https://www.dovepress.com/article/452608)
Supplement: Supplementary file 1 [file get_supplementary_file.php]

**PANoptosis gene set**

| Type        | Gene    |
|-------------|---------|
| Necroptosis | RIPK3   |
| Necroptosis | MLKL    |
| Necroptosis | FAS     |
| Necroptosis | FASLG   |
| Necroptosis | TLR3    |
| Necroptosis | TNF     |
| Necroptosis | RIPK1   |
| Necroptosis | FADD    |
| Pyroptosis  | BAK1    |
| Pyroptosis  | TP63    |
| Pyroptosis  | CHMP2B  |
| Pyroptosis  | BAX     |
| Pyroptosis  | GZMB    |
| Pyroptosis  | CHMP4B  |
| Pyroptosis  | GSDMD   |
| Pyroptosis  | GSDME   |
| Pyroptosis  | IL1A    |
| Pyroptosis  | CHMP3   |
| Pyroptosis  | IRF1    |
| Pyroptosis  | IL1B    |
| Pyroptosis  | CHMP2A  |
| Pyroptosis  | CASP1   |
| Pyroptosis  | CASP5   |
| Pyroptosis  | TP53    |
| Pyroptosis  | CHMP7   |
| Pyroptosis  | IL18    |
| Pyroptosis  | CASP3   |
| Pyroptosis  | CHMP4C  |
| Pyroptosis  | IRF2    |
| Pyroptosis  | CYCS    |
| Pyroptosis  | CHMP6   |
| Pyroptosis  | HMGB1   |
| Pyroptosis  | CASP4   |
| Pyroptosis  | ELANE   |
| Pyroptosis  | CHMP4A  |
| Apoptosis   | DBNL    |
| Apoptosis   | TRAF2   |
| Apoptosis   | PSMA2   |
| Apoptosis   | TLR4    |
| Apoptosis   | ACIN1   |
| Apoptosis   | STK24   |
| Apoptosis   | PSMA4   |
| Apoptosis   | MTOR    |
| Apoptosis   | H1-3    |
| Apoptosis   | ROCK1   |
| Apoptosis   | ITGA5   |
| Apoptosis   | PRKAR1B |
| Apoptosis   | DFFB    |
| Apoptosis   | BID     |
| Apoptosis   | IRAK1   |
| Apoptosis   | AIFM1   |
| Apoptosis   | CRYBA1  |

|           |          |
|-----------|----------|
| Apoptosis | DYNLL2   |
| Apoptosis | PSMD1    |
| Apoptosis | PSMD9    |
| Apoptosis | PRKAR2B  |
| Apoptosis | NTRK1    |
| Apoptosis | CLSPN    |
| Apoptosis | YWHAH    |
| Apoptosis | APIP     |
| Apoptosis | H1-5     |
| Apoptosis | BMF      |
| Apoptosis | STK11    |
| Apoptosis | TICAM1   |
| Apoptosis | CHP1     |
| Apoptosis | PSMC5    |
| Apoptosis | EXOG     |
| Apoptosis | C1QBP    |
| Apoptosis | DFFA     |
| Apoptosis | UBB      |
| Apoptosis | IKBKG    |
| Apoptosis | TFDP2    |
| Apoptosis | GSN      |
| Apoptosis | MYD88    |
| Apoptosis | FNTA     |
| Apoptosis | PKP1     |
| Apoptosis | PPP1R13B |
| Apoptosis | YWHAG    |
| Apoptosis | CASP9    |
| Apoptosis | MAP3K7   |
| Apoptosis | CEACAM6  |
| Apoptosis | DSP      |
| Apoptosis | UNC5B    |
| Apoptosis | LMNB1    |
| Apoptosis | ITGB1    |
| Apoptosis | CASP6    |
| Apoptosis | BBC3     |
| Apoptosis | TLE1     |
| Apoptosis | UNC5A    |
| Apoptosis | NGF      |
| Apoptosis | CHP2     |
| Apoptosis | PSMC4    |
| Apoptosis | PSMB2    |
| Apoptosis | PRKCQ    |
| Apoptosis | VIM      |
| Apoptosis | PPP3CB   |
| Apoptosis | PSMD13   |
| Apoptosis | PSMD8    |
| Apoptosis | PRKAR1A  |
| Apoptosis | BCL2L11  |
| Apoptosis | PSMA3    |
| Apoptosis | IRAK2    |
| Apoptosis | CFLAR    |
| Apoptosis | PSMA1    |
| Apoptosis | AKT1     |
| Apoptosis | NTRK2    |

|           |          |
|-----------|----------|
| Apoptosis | STK26    |
| Apoptosis | PIK3R1   |
| Apoptosis | CHUK     |
| Apoptosis | PIK3R5   |
| Apoptosis | TNFRSF1A |
| Apoptosis | PTRH2    |
| Apoptosis | STAT3    |
| Apoptosis | MAPK1    |
| Apoptosis | PSMB11   |
| Apoptosis | PRKACA   |
| Apoptosis | PSMB7    |
| Apoptosis | XIAP     |
| Apoptosis | APAF1    |
| Apoptosis | NMT1     |
| Apoptosis | TJP2     |
| Apoptosis | H1-0     |
| Apoptosis | PRKX     |
| Apoptosis | PPP3R1   |
| Apoptosis | OCLN     |
| Apoptosis | SEM1     |
| Apoptosis | PPP3CA   |
| Apoptosis | PSMD7    |
| Apoptosis | PIK3CG   |
| Apoptosis | IRAK3    |
| Apoptosis | CTNNB1   |
| Apoptosis | AKT2     |
| Apoptosis | NFKB1    |
| Apoptosis | PPP3R2   |
| Apoptosis | IKKBK    |
| Apoptosis | PRKAR2A  |
| Apoptosis | TFDP1    |
| Apoptosis | PSMC2    |
| Apoptosis | BAD      |
| Apoptosis | UACA     |
| Apoptosis | BRMS1    |
| Apoptosis | PSMC3    |
| Apoptosis | CAPN2    |
| Apoptosis | IL3RA    |
| Apoptosis | PIK3CA   |
| Apoptosis | BMX      |
| Apoptosis | CASP10   |
| Apoptosis | ANKRD13C |
| Apoptosis | ADD1     |
| Apoptosis | PSMD2    |
| Apoptosis | PSMA8    |
| Apoptosis | PSMD12   |
| Apoptosis | ATM      |
| Apoptosis | YWHAE    |
| Apoptosis | DAPK3    |
| Apoptosis | PSMB3    |
| Apoptosis | DAPK2    |
| Apoptosis | DNM1L    |
| Apoptosis | CEACAM5  |
| Apoptosis | PSMB1    |

|           |           |
|-----------|-----------|
| Apoptosis | CDH1      |
| Apoptosis | NFKBIA    |
| Apoptosis | PTK2      |
| Apoptosis | PSMA6     |
| Apoptosis | TNFSF10   |
| Apoptosis | H1-1      |
| Apoptosis | YWHAQ     |
| Apoptosis | DCC       |
| Apoptosis | DIABLO    |
| Apoptosis | SFN       |
| Apoptosis | TICAM2    |
| Apoptosis | BCL2      |
| Apoptosis | IL1RAP    |
| Apoptosis | TNFRSF10A |
| Apoptosis | PSMB6     |
| Apoptosis | LMNA      |
| Apoptosis | TJP1      |
| Apoptosis | CASP7     |
| Apoptosis | MAP3K14   |
| Apoptosis | KPNB1     |
| Apoptosis | PRKACB    |
| Apoptosis | TNFRSF10C |
| Apoptosis | PSMD6     |
| Apoptosis | PSMD3     |
| Apoptosis | PIK3CB    |
| Apoptosis | DSG1      |
| Apoptosis | ENDOD1    |
| Apoptosis | PSME3     |
| Apoptosis | APC       |
| Apoptosis | AVEN      |
| Apoptosis | DYNLL1    |
| Apoptosis | CARD8     |
| Apoptosis | PSMB8     |
| Apoptosis | PSMD11    |
| Apoptosis | PIK3CD    |
| Apoptosis | PSME2     |
| Apoptosis | CDKN2A    |
| Apoptosis | IL3       |
| Apoptosis | MAPK8     |
| Apoptosis | UBA52     |
| Apoptosis | MAGED1    |
| Apoptosis | BCAP31    |
| Apoptosis | RPS27A    |
| Apoptosis | CAV1      |
| Apoptosis | BCL2L1    |
| Apoptosis | IRAK4     |
| Apoptosis | BIRC2     |
| Apoptosis | CAPN1     |
| Apoptosis | E2F1      |
| Apoptosis | PIK3R2    |
| Apoptosis | MAPK3     |
| Apoptosis | OMA1      |
| Apoptosis | SEPTIN4   |
| Apoptosis | PSMA7     |

|           |           |
|-----------|-----------|
| Apoptosis | CASP8     |
| Apoptosis | ARHGAP10  |
| Apoptosis | TSC2      |
| Apoptosis | PSMB10    |
| Apoptosis | SNAI2     |
| Apoptosis | ENDOG     |
| Apoptosis | PSMB4     |
| Apoptosis | PLEC      |
| Apoptosis | PMAIP1    |
| Apoptosis | SPTAN1    |
| Apoptosis | APPL1     |
| Apoptosis | PSMB5     |
| Apoptosis | PSMD10    |
| Apoptosis | NOTCH1    |
| Apoptosis | DSG2      |
| Apoptosis | LY96      |
| Apoptosis | AKT3      |
| Apoptosis | DAPK1     |
| Apoptosis | SIK1      |
| Apoptosis | IL1R1     |
| Apoptosis | CHEK2     |
| Apoptosis | TNFRSF10B |
| Apoptosis | PK4       |
| Apoptosis | MCL1      |
| Apoptosis | PSMA5     |
| Apoptosis | MYBBP1A   |
| Apoptosis | KPNA1     |
| Apoptosis | RELA      |
| Apoptosis | TNFRSF10D |
| Apoptosis | PSMC1     |
| Apoptosis | TP73      |
| Apoptosis | PRKCD     |
| Apoptosis | PRKACG    |
| Apoptosis | TLE5      |
| Apoptosis | MAPT      |
| Apoptosis | PSME4     |
| Apoptosis | HMGB2     |
| Apoptosis | SATB1     |
| Apoptosis | TP53BP2   |
| Apoptosis | PAK2      |
| Apoptosis | H1-4      |
| Apoptosis | CSF2RB    |
| Apoptosis | PSMD4     |
| Apoptosis | GAS2      |
| Apoptosis | PSME1     |
| Apoptosis | PSMD14    |
| Apoptosis | TRADD     |
| Apoptosis | SRC       |
| Apoptosis | PSMC6     |
| Apoptosis | H1-2      |
| Apoptosis | DSG3      |
| Apoptosis | PSMD5     |
| Apoptosis | UBC       |
| Apoptosis | PSMB9     |

|           |        |
|-----------|--------|
| Apoptosis | PPP3CC |
| Apoptosis | PSMF1  |
| Apoptosis | ZNF304 |
| Apoptosis | YWHAB  |
| Apoptosis | PIK3R3 |
| Apoptosis | BIRC3  |
| Apoptosis | YWHAZ  |
| Apoptosis | CD14   |
| Apoptosis | OPA1   |
